# Supplementary material for: Fluorescence Microscopy Study of the Intracellular Sulfur Globule Protein SgpD in the Purple Sulfur Bacterium Allochromatium vinosum
Source: MDPI journal article supplement (doi:10.3390/microorganisms11071792), 2023-07-12
Supplement: s1 [file s1]

**Table S1.** Bacterial strains, primers and plasmids used in this study

| Strain or Plasmid           | Genotype or Phenotype                                                                                                                                                                          | Reference |
|-----------------------------|------------------------------------------------------------------------------------------------------------------------------------------------------------------------------------------------|-----------|
| <i>E. coli</i> strains      |                                                                                                                                                                                                |           |
| S17-1                       | 294 ( <i>recA thi pro hsdR-M</i> <sup>+</sup> ) Tp <sup>r</sup> Sm <sup>r</sup> [RP4-2-Tc::Mu-Km:Tn7]                                                                                          | [67]      |
| DH5α                        | F <sup>-</sup> Φ80 <i>lacZ</i> ΔM15 Δ( <i>lacZYA-argF</i> ) U169 <i>recA1 endA1 hsdR17</i> (rK <sup>-</sup> , mK <sup>+</sup> )<br><i>phoA supE44 λ<sup>-</sup> thi-1 gyrA96 relA1</i>         | [68]      |
| <i>A. vinosum</i> strains   |                                                                                                                                                                                                |           |
| Rif50                       | Rif <sup>r</sup> , spontaneous rifampicin-resistant mutant of DSM 180 <sup>T</sup>                                                                                                             | [54]      |
| <i>sgpD</i> :: Km           | Rif <sup>r</sup> , Km <sup>r</sup> , <i>sgpD</i> :: Km (in <i>A. vinosum</i> Rif50)                                                                                                            | This work |
| Plasmids                    |                                                                                                                                                                                                |           |
| pBBR1MCS-2                  | Km <sup>r</sup> , Mob <sup>+</sup> , <i>rep</i> , <i>lacZ</i>                                                                                                                                  | [69]      |
| pBBR1MCS-5                  | Gm <sup>r</sup> , Mob <sup>+</sup> , <i>rep</i> , <i>lacZ</i>                                                                                                                                  | [69]      |
| pBBR1MCS2-L                 | Km <sup>r</sup> , XbaI–HindIII fragment of PCR-amplified <i>dsr</i> promoter and <i>dsrL</i> in XbaI–HindIII of pBBR1MCS-2                                                                     | [54]      |
| pBBR1-L-Gm                  | Gm <sup>r</sup> , RsrII fragment of PCR-amplified gentamycin resistance cassette in RsrII of pBBR1MCS2-L                                                                                       | This work |
| pmCherry                    | Amp <sup>r</sup> , mCherry                                                                                                                                                                     | [37]      |
| pBBR_dsr_mCherry_Gm         | Gm <sup>r</sup> , NdeI-SalI fragment of PCR-amplified gene for mCherry in NdeI-SalI of pBBR1-L-Gm, <i>dsr</i> promoter                                                                         | This work |
| pBBR_dsr_Sec2515_mCherry_Gm | Gm <sup>r</sup> , NdeI-SalI fragment of PCR-amplified gene for mCherry in NdeI-SalI of pBBR1-L-Gm, <i>dsr</i> promoter, PCR forward primer encoding <i>sgpD</i> signal sequence                | This work |
| pBBR_dsr_sgpD_mCherry       | Gm <sup>r</sup> , NdeI fragment of PCR amplified <i>sgpD</i> (including signal peptide encoding sequence) in NdeI of pBBR_dsr_mCherry_Gm                                                       | This work |
| pHP45ΩKm                    | Ap <sup>r</sup> , Km <sup>r</sup> , pHP45Ω with kanamycin cassette                                                                                                                             | [61]      |
| pSUP301                     | Ap <sup>r</sup> , Km <sup>r</sup> , RP4 oriT p15A ori Mob <sup>+</sup>                                                                                                                         | [67]      |
| pSUP301_Δ <i>sgpD</i>       | Ap <sup>r</sup> , Mob <sup>+</sup> , HindIII fragment of PCR-amplified genome region around <i>sgpD</i> (Alvin_2515) with deletion of 603 bp of the <i>sgpD</i> sequence in HindIII of pSUP301 | This work |
| pSUP301_Δ <i>sgpD</i> _ΩKm  | Ap <sup>r</sup> , Km <sup>r</sup> , Mob <sup>+</sup> , ΩKm cassette from pHP45ΩKm inserted into pSUP301_Δ <i>sgpD</i> using EcoRI                                                              | This work |
| Primers                     |                                                                                                                                                                                                |           |
| Del-Alvin2515-fw1           | ATGATAAAGCTTCAACCTCGATTCGCCACCAC                                                                                                                                                               | This work |
| Del-Alvin2515-rev1          | TGCGGCTTTTTAGAATTCCATGTGACACACCTTGAAAAGACAG (EcoRI)                                                                                                                                            | This work |
| Del-Alvin2515-fw2           | GTGTGTCACATGGAATTCTAAAAAGCCGCATGCGGGGTC (EcoRI)                                                                                                                                                | This work |
| Del-Alvin2515-rev2          | ATGATAAAGCTTCATCAGCCGGTCGTCGT                                                                                                                                                                  | This work |
| Gent-CpoI-Fw                | ATGATACGGTCCGCTGTCGTGCCAGCTGCATTA (RsrII)                                                                                                                                                      | This work |
| Gent-CpoI-Rev               | ATGATACGGACCGATCTCGGCTTGAACGAA (RsrII)                                                                                                                                                         | This work |
| for-mCherry-NdeI            | ATAGCTCATATGGTGAGCAAGGGCGAGGA (NdeI)                                                                                                                                                           | This work |
| rev-mCherry-SalI            | ATAGCTGTCGACCCGCTACTTGTACAGCTCGTC (SalI)                                                                                                                                                       | This work |
| fAlvin2515-NdeI             | ATAGCTCATATGTCCAAGCTGATCCAAACC (NdeI)                                                                                                                                                          | This work |
| rAlvin2515-NdeI             | ATAGCTCATATGGCGCGTTTGGGAGGAAGG (NdeI)                                                                                                                                                          | This work |
| fo-mCher-SacIIV4            | ATAGCTCCGCGGCGAACTGATTCGGGTCGAGCC (SacII)                                                                                                                                                      | This work |
| re-mCher-NdeIV4             | ATAGCTCATATGGCGCGTTTGGGAGGAAGGC(NdeI)                                                                                                                                                          | This work |
| for-mCher-Sig               | ATAGCTCATATGTCCAAGCTGATCCAAACCGTCTCCGCCATCG<br>CGCTCGCTGCCGCCACGACCACGGCCTTCGCCTGGATGGTGAG<br>CAAGGGCGAGGA (NdeI)                                                                              | This work |
| re-Prom2515-NdeI            | ATAGTCCATATGGTGACACACCTTGAAAAGACAG (NdeI)                                                                                                                                                      | This work |

---

## References

37. Shaner, N.C.; Campbell, R.E.; Steinbach, P.A.; Giepmans, B.N.; Palmer, A.E.; Tsien, R.Y. Improved monomeric red, orange and yellow fluorescent proteins derived from *Discosoma* sp. red fluorescent protein. *Nat. Biotechnol.* **2004**, *22*, 1567-1572.
54. Lübke, Y.J.; Youn, H.S.; Timkovich, R.; Dahl, C. Siro(haem)amide in *Allochromatium vinosum* and relevance of DsrL and DsrN, a homolog of cobyrinic acid *a,c* diamide synthase for sulphur oxidation. *FEMS Microbiol. Lett.* **2006**, *261*, 194-202.
61. Fellay, R.; Frey, J.; Krisch, H.M. Interposon mutagenesis of soil and water bacteria: a family of DNA fragments designed for in vitro insertional mutagenesis of Gram-negative bacteria. *Gene* **1987**, *52*, 147-154.
67. Simon, R.; Priefer, U.; Pühler, A. A broad host range mobilization system for in vivo genetic engineering: transposon mutagenesis in gram negative bacteria. *Nat. Biotechnol.* **1983**, *1*, 784-791.
68. Hanahan, D. Studies on transformation of *Escherichia coli* with plasmids. *J. Mol. Biol.* **1983**, *166*, 557-580.
69. Kovach, M.E.; Elzer, P.H.; Hill, D.S.; Robertson, G.T.; Farris, M.A.; Roop, R.M., II; Peterson, K.M. Four new derivatives of the broad-host-range cloning vector pBBR1MCS, carrying different antibiotic-resistance cassettes. *Gene* **1995**, *166*, 175-176.
